# Supplementary material
Source: HighWire-hosted journal article supplement (https://jnis.bmj.com/highwire/filestream/167591/field_highwire_adjunct_files/1/neurintsurg-2021-017888supp002_data_supplement.pdf)
Supplement: neurintsurg-2021-017888supp002_data_supplement.pdf [file neurintsurg-2021-017888supp002_data_supplement.pdf]

| Author          | Year | Country  | Patients | Type of Study                                    | Primary Group (n)                                                        | Comparison Group (n)                                                                     | Major Endpoints            | Outcomes                                                                                                                                                      | Comments                                                                                                                                                                                                                                                                                                                                             |
|-----------------|------|----------|----------|--------------------------------------------------|--------------------------------------------------------------------------|------------------------------------------------------------------------------------------|----------------------------|---------------------------------------------------------------------------------------------------------------------------------------------------------------|------------------------------------------------------------------------------------------------------------------------------------------------------------------------------------------------------------------------------------------------------------------------------------------------------------------------------------------------------|
| Nogueira et al. | 2008 | Multiple | 305      | Retrospective analysis of prospective trial data | Abnormal Bleeding = INR > 1.7 or PTT > 45 sec or platelet < 100K/uL (35) | Normal Bleeding = INR $\leq$ 1.7 and PTT $\leq$ 45 sec and platelet $\geq$ 100K/uL (270) | TIMI, sICH, 90DmRS         | Abnormal: TIMI 2-3 = 60%, sICH = 8.6%, 90DmRS <3 = 9%<br>Normal: TIMI 2-3 = 65%, sICH = 8.5%, 90DmRS <3 = 35%                                                 | Only 6/35 (17%) of the primary group had thrombocytopenia. Abnormal bleeding group also had worse pre stroke health states, likely confounding results                                                                                                                                                                                               |
| Monch et al.    | 2019 | Germany  | 294      | Retrospective, single center                     | Initial thrombocytopenia (< 150K/uL) (29)                                | Normal Platelet ( $\geq$ 150 K/uL) (265)                                                 | sICH, 90Dmortality, 90DmRS | Thrombocytopenia: sICH = 10.3%, 90Dmortality = 48.3%, 90DmRS<3 = 24%<br>Normal platelet: sICH = 6.8%, 90Dmortality = 22.6%, 90DmRS<3 = 37%                    | Only significant difference was mortality. No adjustment for prestroke functional status. Also performed analysis of patients with and without a drop in platelet counts (DPC) after presentation, showing that a DPC > 26% predicted mortality and worse clinical outcomes too                                                                      |
| Desai et al.    | 2019 | USA      | 555      | Retrospective, single center                     | Thrombocytopenia (<150K/uL) (74)                                         | Normal Platelet ( $\geq$ 150 K/uL) (481)                                                 | sICH, 90Dmortality, 90DmRS | Thrombocytopenia: sICH = 8.1-10.81%, 90Dmortality = 43.24%, 90DmRS<3 = 24.32%<br>Normal platelet: sICH = 2.49-8.79%, 90Dmortality = 24.74%, 90DmRS<3 = 36.38% | Mortality and mRS worse. Used 3 separate definitions of sICH, with one having a statistical difference between groups, but 2 others did not. Performed subgroup analysis stratifying thrombocytopenic patients into (1) <100K/uL and (2) 100-150K/uL, with no real differences. Multivariate analysis: thrombocytopenia not related to rate of sICH. |
